# Supplementary material
Source: publisher site journal article supplement (https://www.spandidos-publications.com/3507/downloadSupplementary)

Figure S1. Graphical representation of the potential mechanism of miR-101a-3p to improve acetylcholine-CaCl<sub>2</sub>-induced atrial fibrillation in vivo. miR, microRNA; EZH2, enhancer of zeste 2 homolog 2.

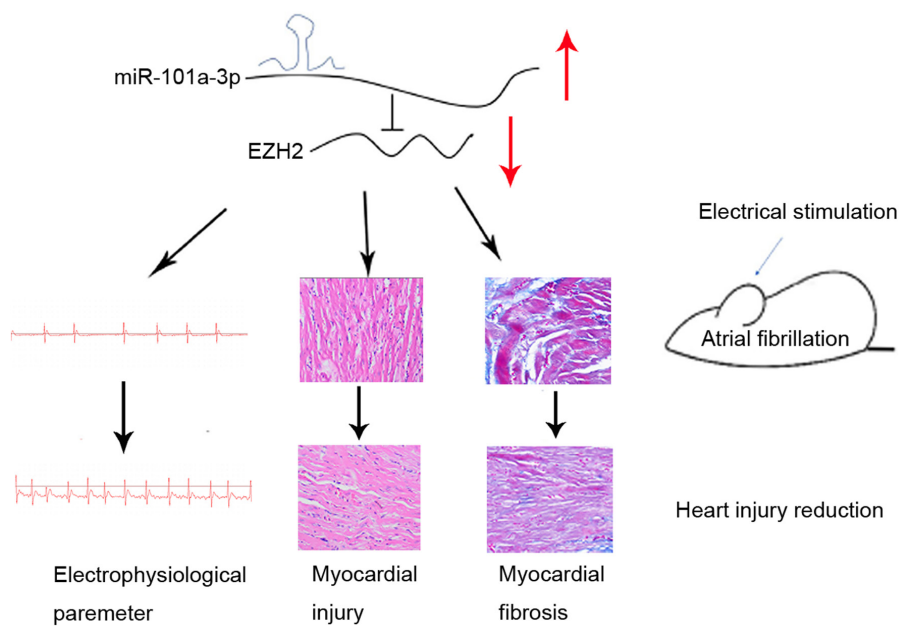

Supplement: Supplementary file 1 [file downloadSupplementary]
